# Supplementary material for: Within-Compound Versus Public Latrine Access and Child Feces Disposal Practices in Low-Income Neighborhoods of Accra, Ghana
Source: PubMed Central journal article supplement (PMC5953368; doi:10.4269/ajtmh.17-0654), 2018-03-19
Supplement: tpmd170654.SD1.pdf [file tpmd170654.SD1.pdf]

SUPPLEMENTAL TABLE 1

Sociodemographic characteristics for 785 urban households in four low-income neighborhoods of Accra, Ghana, by neighborhood

| Neighborhood                                  | Alajo <i>N</i> = 205 | Bukom <i>N</i> = 175 | Old Fadama <i>N</i> = 204 | Shiabu <i>N</i> = 201 | <i>P</i> value* |
|-----------------------------------------------|----------------------|----------------------|---------------------------|-----------------------|-----------------|
| Education of caregiver, % ( <i>n</i> )        |                      |                      |                           |                       |                 |
| No formal education                           | 14.2 (29)            | 15.4 (27)            | 47.6 (97)                 | 8.0 (16)              | < 0.0001        |
| Completed primary                             | 20.0 (41)            | 41.7 (73)            | 21.1 (43)                 | 20.9 (42)             |                 |
| Completed secondary or higher                 | 65.9 (135)           | 42.9 (75)            | 31.4 (64)                 | 71.1 (143)            |                 |
| Tenancy status (own), % ( <i>n</i> )          | 51.7 (106)           | 82.3 (144)           | 66.2 (135)                | 52.2 (105)            | < 0.0001        |
| Religion, % ( <i>n</i> )                      |                      |                      |                           |                       |                 |
| Christian                                     | 77.6 (159)           | 89.1 (156)           | 33.8 (69)                 | 96.0 (193)            | < 0.0001        |
| Muslim                                        | 22.4 (46)            | 8.0 (14)             | 64.2 (131)                | 3.0 (6)               |                 |
| Other                                         | 0 (0)                | 2.9 (5)              | 2.0 (4)                   | 1.0 (2)               |                 |
| Households living in compound, % ( <i>n</i> ) | 79.6 (163)           | 82.5 (144)           | 59.5 (121)                | 94.6 (190)            | < 0.0001        |
| Number of people in household, mean (SD)      | 5.26 (3.58)          | 5.67 (4.86)          | 8.97 (69.72)              | 4.53 (1.98)           | 0.61            |
| Wealth index, mean (SD)†                      | 0.28 (0.85)          | -0.14 (1.15)         | -0.34 (0.96)              | 0.31 (0.83)           | < 0.0001        |
| Facility access, % ( <i>n</i> )*              |                      |                      |                           |                       |                 |
| Private basic facility                        | 3.2 (16)             | 0.01 (1)             | 0 (0)                     | 2.0 (4)               | < 0.0001        |
| Compound-shared basic facility                | 44.9 (92)            | 6.3 (11)             | 1.5 (3)                   | 35.8 (72)             |                 |
| Public facility                               | 47.3 (97)            | 93.1 (163)           | 98.5 (201)                | 62.2 (125)            |                 |
| Water source, % ( <i>n</i> )                  |                      |                      |                           |                       |                 |
| Sachet                                        | 74.6 (153)           | 71.4 (125)           | 92.2 (188)                | 73.1 (147)            | < 0.0001        |
| Municipal piped water                         | 24.9 (51)            | 28.0 (49)            | 7.4 (15)                  | 25.9 (52)             |                 |
| Tap of polytank with stored piped water       | 0.5 (1)              | 0.6 (1)              | 0.5 (1)                   | 1.0 (2)               |                 |
| Animal presence in HH, % ( <i>n</i> )         | 33.8 (69)            | 23.4 (41)            | 20.7 (42)                 | 38.3 (77)             | 0.0002          |

SD = standard deviation.

\* *P* value for differences across neighborhoods in number (percentage) of households from  $\chi^2$  distribution, and from ANOVA for mean and standard deviation.

† Wealth index calculated by principal component analysis of eight household assets using the PROC FACTOR command.
